# Supplementary material for: Realization of white-light-emitting diodes from a high-brightness zirconium-based metal–organic gel driven by the AIE effect
Source: Royal Society of Chemistry journal article supplement (doi:10.1039/d3dt03184e), 2024-01-01
Supplement: d3dt03184e1.pdf [file d3dt03184e1.pdf]

## Supporting information

### **Realization of white-light-emitting diodes from a high-brightness zirconium-based metal-organic gel driven by AIE effect**

*Jianxin Song,<sup>†a</sup> Lisha Jiang,<sup>†\*a</sup> Xiaoze Wang,<sup>b</sup> Chuanxin Hou,<sup>\*a</sup> Xuemin Wang,<sup>a</sup> Zijun Xu,<sup>a</sup> Chao Liang,<sup>a</sup> Mengnan Yuan,<sup>d</sup> Chuan Tan,<sup>a</sup> Jing Yang,<sup>e</sup> Enhai Song,<sup>c</sup> Yanlong Wang<sup>\*f</sup> and Wei Liu<sup>\*a</sup>*

<sup>a</sup> School of Environmental and Material Engineering, Yantai University, Yantai, 264005, Shandong, China

<sup>b</sup> MOE Key Laboratory for Analytical Science of Food Safety and Biology and State Key Laboratory of Photocatalysis on Energy and Environment, College of Chemistry, Fuzhou University, Fuzhou, China.

<sup>c</sup> State Key Laboratory of Luminescent Materials and Devices and Institute of Optical Communication Materials, South China University of Technology, Guangzhou, 510641, China;

<sup>d</sup> School of Civil Engineering, Yantai University, Yantai 264005, China

<sup>e</sup> College of Chemical and Biological Engineering, Shandong University of Science and Technology, Qingdao 266590, Shandong, PR China

<sup>f</sup> State Key Laboratory of Radiation Medicine and Protection School for Radiological and interdisciplinary Sciences (RAD-X) and Collaborative Innovation Center of Radiation Medicine of Jiangsu Higher Education Institutions, Soochow University.

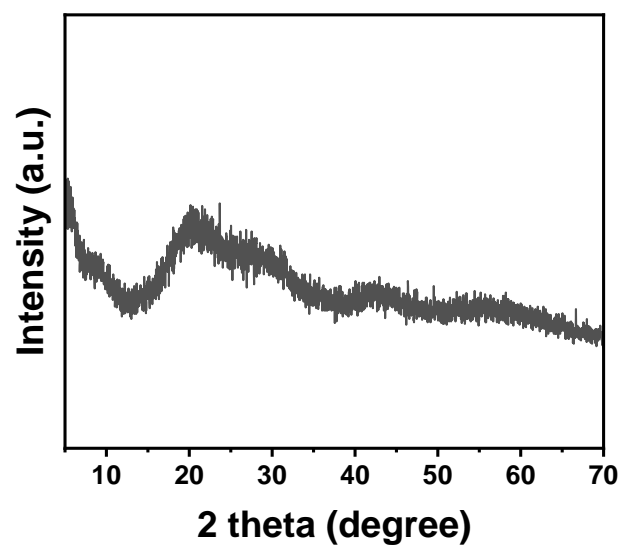

**Figure S1.** PXRD pattern of YTU-G-1(SE).

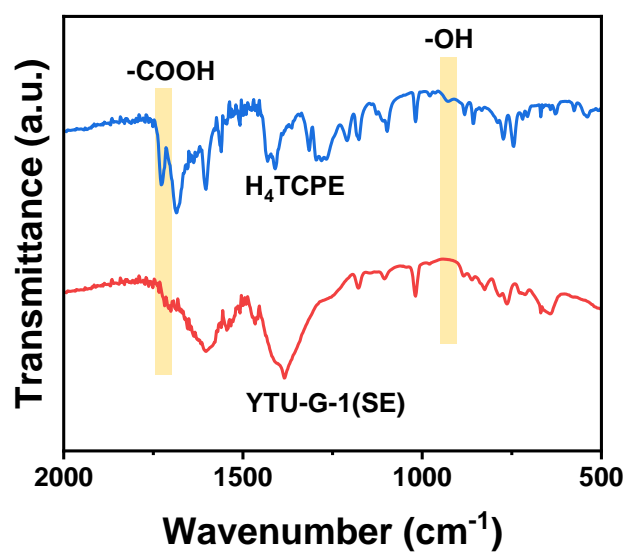

Figure S2. FTIR spectra of H<sub>4</sub>TCPE and YTU-G-1(SE).

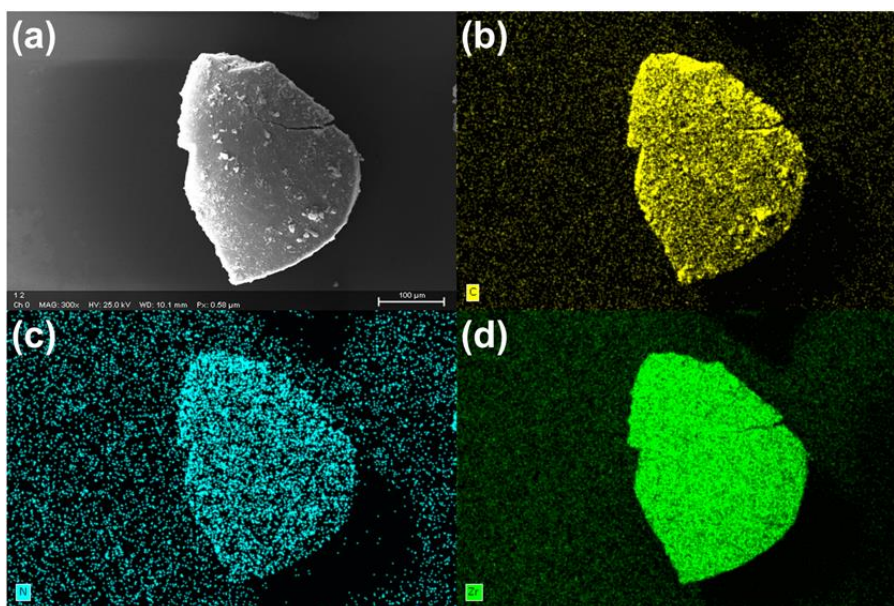

**Figure S3.** (a) The SEM images of YTU-G-1(SE) and Element-mapping images of (b) C, (c) N, (d) Zr.

**Table S1.** The elemental analysis results of YTU-W-1(SE)

| Sample      | N (%) | C (%) | H (%) | O (%) | Zr (%) |
|-------------|-------|-------|-------|-------|--------|
| YTU-G-1(SE) | 1.80  | 43.67 | 3.62  | 23.40 | 27.51  |

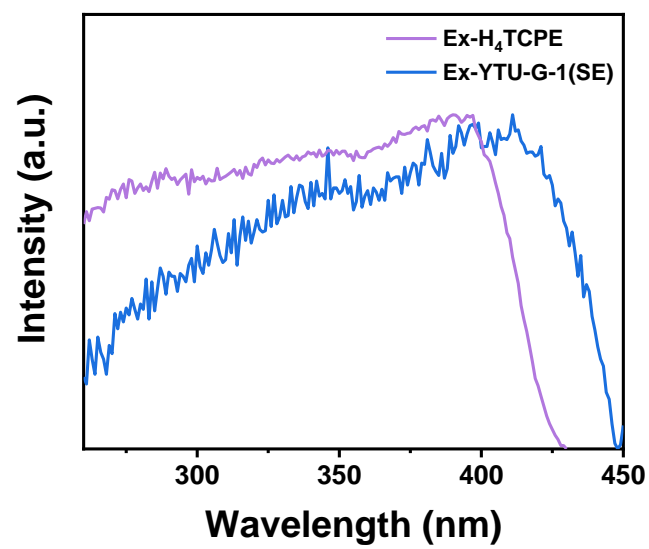

Figure S4. The excitation spectra of H<sub>4</sub>TCPE and YTU-G-1(SE).

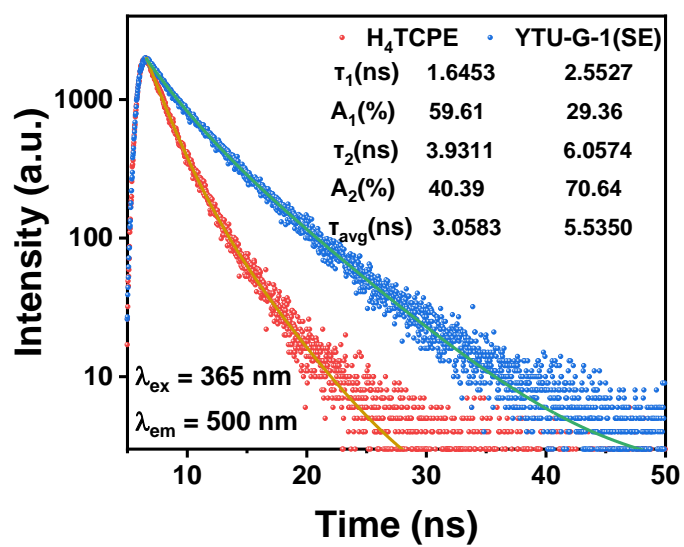

Figure S5. The decay curve of H<sub>4</sub>TCPE and YTU-G-1(SE).

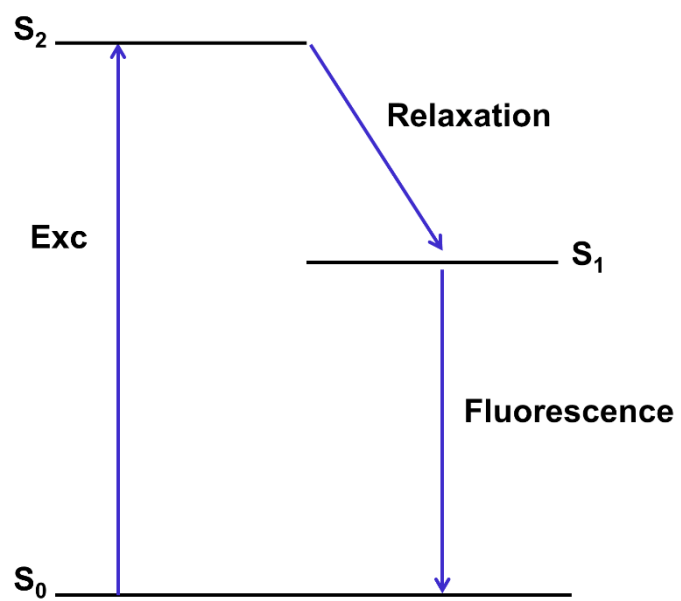

**Figure S6.** The light-emitting mechanism of YTU-G-1(SE).

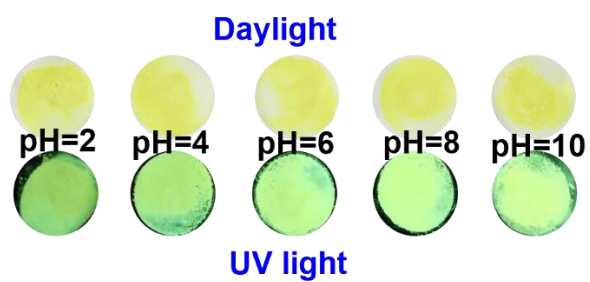

**Figure S7.** The corresponding photographs of YTU-G-1(SE) under daylight and UV light immersed in deionized water for different pH.



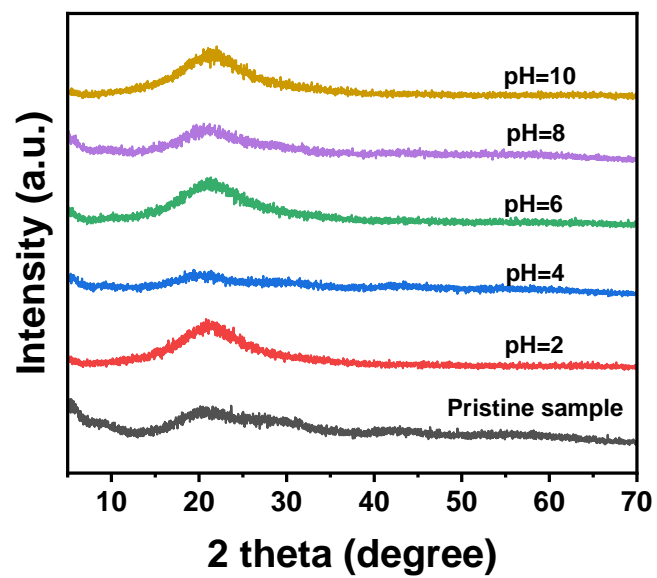

**Figure S8.** The PXRD patterns of YTU-G-1(SE) after treatment in aqueous solutions with different pH values.

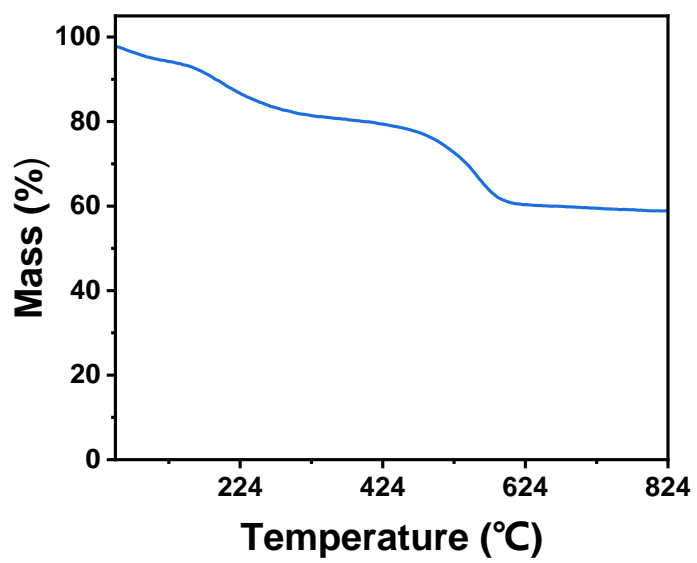

**Figure S9.** TGA curves of YTU-G-1(SE) under Ar.

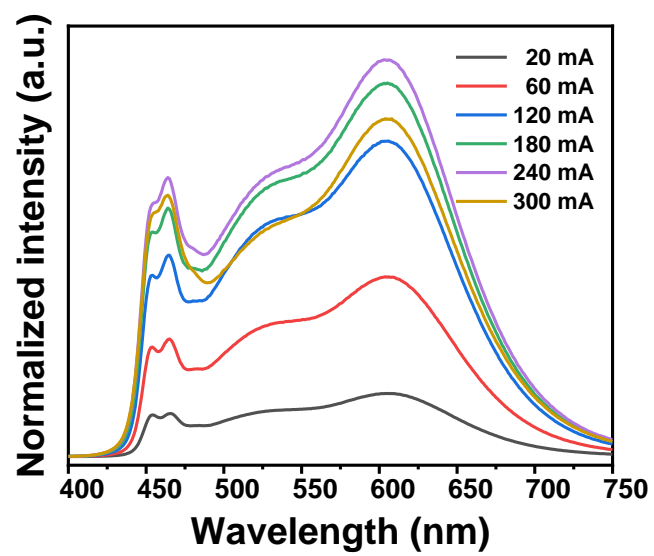

**Figure S10.** The EL spectra of the fabricated LED under various drive currents.

**Table S2.** Summary of yellow phosphors used for WLED devices.

| Materials                                                                                       | IQE/EQE (%) | Synthesis temperature (°C) | CCT (K) | Ra   | Reference |
|-------------------------------------------------------------------------------------------------|-------------|----------------------------|---------|------|-----------|
| NaAlSiO <sub>4</sub> :Eu <sup>2+</sup>                                                          | 95.14/78.14 | 1300                       | 5941    | 92   | 1         |
| (Ba,Sr)Si <sub>3</sub> Al <sub>3</sub> O <sub>4</sub><br>N <sub>5</sub> :Yb <sup>2+</sup>       | 86.9/35.0   | 1600                       | 5650    | 80   | 2         |
| Lu <sub>3</sub> (Al,Mg) <sub>2</sub> (Al,<br>Si) <sub>3</sub> O <sub>12</sub> :Ce <sup>3+</sup> | 85.1/49.3   | 1350                       | 6164    | 75.6 | 3         |
| InGaN/GaN                                                                                       | 39/0.014    | 600                        | 6056    | 87.7 | 4         |
| Li- $\alpha$ -<br>SiAlON:Eu <sup>2+</sup>                                                       | —           | 1700                       | 6150    | 72   | 5         |
| YTU-G-1(SE)                                                                                     | 95.74/88.67 | 100                        | 3736    | 88.2 | This work |

## References

1. S. Liao, A. Song, J. Zhang, X. Fu and K. Zhang, *Ceram. Int.*, 2023, **49**, 27408-27415.
2. Y. Lv, Y. Li, S. Fan, C. Chen, Y. Cai, H. Xu and R.-J. Xie, *Inorg. Chem. Front.*, 2022, **9**, 4930-4938.
3. H. Ji, L. Wang, M. S. Molokeev, N. Hirosaki, R. Xie, Z. Huang, Z. Xia, O. M. ten Kate, L. Liu and V. V. Atuchin, *J. Mater. Chem. C*, 2016, **4**, 6855-6863.
4. B. Janjua, T. K. Ng, C. Zhao, A. Prabaswara, G. B. Consiglio, D. Priante, C. Shen, R. T. Elafandy, D. H. Anjum, A. A. Alhamoud, A. A. Alatawi, Y. Yang, A. Y. Alyamani, M. M. El-Desouki and B. S. Ooi, *ACS Photon.*, 2016, **3**, 2089-2095.
5. R.-J. Xie, N. Hirosaki, M. Mitomo, K. Takahashi and K. Sakuma, *Appl. Phys. Lett.*, 2006, **88**, 101104.
